# Supplementary material for: Understanding How Clinicians Personalize Fluid and Vasopressor Decisions in Early Sepsis Management
Source: PubMed Central journal article supplement (PMC11031682; doi:10.1001/jamanetworkopen.2024.7480), 2024-04-19
Supplement: jamanetwopen-e247480-s002.pdf [file jamanetwopen-e247480-s002.pdf]

## Data Sharing Statement

Munroe. Understanding How Clinicians Personalize Fluid and Vasopressor Decisions in Early Sepsis Management. *JAMA Netw Open*. Published April 19, 2024.

doi:10.1001/jamanetworkopen.2024.7480

### Data

**Data available:** Yes

**Data types:** Deidentified participant data

**How to access data:** Requests for data can be sent to [munroeel@med.umich.edu](mailto:munroeel@med.umich.edu)

**When available:** With publication

### Supporting Documents

**Document types:** Other (please specify)

**Additional Information:** Full Survey

**How to access documents:** Online Supplement

**When available:** With publication

### Additional Information

**Who can access the data:** anyone requesting the data

**Types of analyses:** for any purpose

**Mechanisms of data availability:** with investigator support
